# Supplementary material
Source: Springer Nature journal article supplement (https://www.springermedizin.de/resource/supplementary/13601_2014_1071_MOESM3_ESM.pdf/9678644)
Supplement: MOESM3 [file 9678644]

**Other and unspecified effects of external causes (T66-T78)****T76 Adverse effects, not elsewhere classified**

Note: This category is to be used as the primary code to identify the effects, not elsewhere classifiable, of unknown, undetermined or ill-defined causes. For multiple coding purposes this category may be used as an additional code to identify the effects of conditions classified elsewhere.

Exclusion:

[complications of surgical and medical care NEC \(T80-T88\)](#)

**T78.0 Anaphylactic shock due to adverse food reaction****T78.1 Other adverse food reactions, not elsewhere classified**

Exclusions:

[bacterial foodborne intoxications \(A05.-\)](#)

[dermatitis due to food \(L27.2\)](#)

dermatitis due to food

**T78.2 Anaphylactic shock, unspecified**

Allergic shock

Anaphylactic reaction

Anaphylaxis

Exclusions:

anaphylactic shock due to:

[adverse effect of correct medicinal substance properly administered \(T88.6\)](#)

[adverse food reaction \(T78.0\)](#)

[serum \(T80.5\)](#)

**T78.3 Angioneurotic oedema**

Giant urticaria

Quincke oedema

Excl.:

[urticaria \(L50.-\)](#)

urticaria

**T78.4 Allergy, unspecified**

Allergic reaction NOS

Hypersensitivity NOS

Idiosyncrasy NOS

Exclusions:

[allergic reaction NOS to correct medicinal substance properly administered \(T88.7\)](#)

specified types of allergic reaction such as:

[allergic gastroenteritis and colitis \(K52.2\)](#)

dermatitis (L23-L25, L27.-)

[hay fever \(J30.1\)](#)

**T78.8 Other adverse effects, not elsewhere classified****T78.9 Adverse effect, unspecified**

Exclusions:

[adverse effect of surgical and medical care NOS \(T88.9\)](#)

**Other and unspecified effects of external causes**

MD81 Adverse effects, not elsewhere classified

**Parent**

Other and unspecified effects of external causes

**Definition****Inclusions**

Allergic shock NOS

Anaphylactic reaction NOS

Anaphylaxis NOS

Allergic reaction NOS

Hypersensitivity NOS

Idiosyncrasy NOS

**Exclusions**

complications of surgical and medical care NEC

anaphylactic shock due to: adverse food reaction

anaphylactic shock due to: adverse effect of correct medicinal substance properly administered

anaphylactic shock due to: serum

specified types of allergic reaction such as: dermatitis

allergic reaction NOS to correct medicinal substance properly administered

specified types of allergic reaction such as: allergic gastroenteritis and colitis

specified types of allergic reaction such as: hay fever

**Disorders of the skin****Adverse cutaneous sequelae of medication and treatment**

Adverse cutaneous reactions to medication

EL72 Drug-induced urticaria, angioedema and anaphylaxis

EL72.1 Drug-induced urticaria

EL72.2 Drug-induced angioedema

EL72.3 Drug-induced anaphylaxis

EL72.Y Other specified drug-induced urticaria, angioedema and anaphylaxis

EL72.Z Drug-induced urticaria, angioedema and anaphylaxis, unspecified
